# Supplementary material for: A phase 1 study of regorafenib and sildenafil in adults with advanced solid tumors
Source: PubMed Central journal article supplement — Anticancer Drugs. 2024 Mar 8;35(5):450–8. doi: 10.1097/CAD.0000000000001584 (PMC11168782; doi:10.1097/cad.0000000000001584), 2024-03-08
Supplement: acd-35-450-s001.pdf [file acd-35-450-s001.pdf]

**Supplemental Table 1. PDE5 immunohistochemistry.** Archived tumor tissue samples from 25 patients were used to determine the level of PDE5, which showed no correlation with Stable Disease.

| Sample | PDE5 score |
|--------|------------|
| 002    | 1          |
| 004    | -1         |
| 005    | -1         |
| 006    | 1          |
| 007    | 1          |
| 008    | 2          |
| 009    | 1          |
| 010    | 1          |
| 012    | 0          |
| 013    | 0          |
| 014    | 1          |
| 015    | -1         |
| 016    | 1          |
| 020    | 2          |
| 021    | 0          |
| 022    | 2          |
| 023    | 0          |
| 024    | 1          |
| 026    | 1          |
| 027    | 1          |
| 028    | 2          |
| 029    | 2          |
| 030    | 0          |
| 031    | 1          |
| 032    | 2          |
