# Supplementary material for: A phase 1 study of regorafenib and sildenafil in adults with advanced solid tumors
Source: PubMed Central journal article supplement — Anticancer Drugs. 2024 Mar 8;35(5):450–8. doi: 10.1097/CAD.0000000000001584 (PMC11168782; doi:10.1097/cad.0000000000001584), 2024-03-08
Supplement: acd-35-450-s002.pdf [file acd-35-450-s002.pdf]

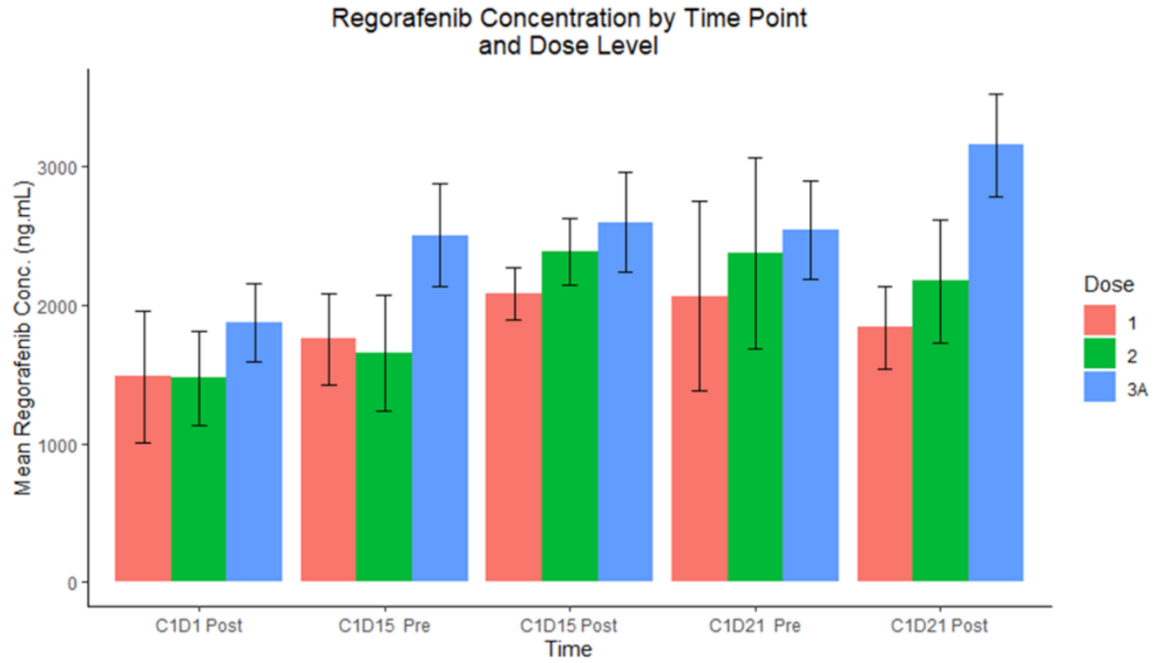

**Supplemental Figure 1. Pharmacokinetic analysis.** One hundred forty plasma samples from 31 patients were analyzed to determine the concentration of regorafenib. Sildenafil showed no significant effect on the PK profile of regorafenib.
